# Supplementary material for: Sarcopenia, Obesity, and Sarcopenic Obesity: Relationship with Skeletal Muscle Phenotypes and Single Nucleotide Polymorphisms
Source: MDPI journal article supplement (doi:10.3390/jcm10214933), 2021-10-25
Supplement: s1 [file s1]

**Table S2.** Genotype distributions of SNPs associated with sarcopenia in obese elderly women

| SNPs                   | Sarcopenic obese (n = 77) | Non-sarcopenic obese (n = 176) |
|------------------------|---------------------------|--------------------------------|
| <i>ACTN3</i> rs1815739 | CC = 33 (42.9%)           | CC = 52 (29.9%)                |
|                        | CT = 29 (37.7%)           | CT = 79 (45.4%)                |
|                        | TT = 15 (19.5%)           | TT = 43 (24.7%)                |
| <i>MTHFR</i> rs1801131 | GG = 10 (13.2%)           | GG = 11 (6.3%)                 |
|                        | GT = 38 (50.0%)           | GT = 76 (43.7%)                |
|                        | TT = 28 (36.8%)           | TT = 87 (50.0%)                |
| <i>MTHFR</i> rs1537516 | AA = 0 (0.0%)             | AA = 3 (1.7%)                  |
|                        | AG = 23 (29.9%)           | AG = 22 (12.6%)                |
|                        | GG = 54 (70.1%)           | GG = 149 (85.6%)               |

% indicates the distribution of genotypes within the sarcopenic obese and non-sarcopenic obese population
