# Supplementary material for: Sarcopenia, Obesity, and Sarcopenic Obesity: Relationship with Skeletal Muscle Phenotypes and Single Nucleotide Polymorphisms
Source: MDPI journal article supplement (doi:10.3390/jcm10214933), 2021-10-25
Supplement: s1 [file s1]

**Table S1.** Previous associations of single nucleotide polymorphisms with muscle-related phenotypes/performance

| Single nucleotide polymorphism | Phenotype                                | Main results                                                                                | References                                      |
|--------------------------------|------------------------------------------|---------------------------------------------------------------------------------------------|-------------------------------------------------|
| <i>ACTN3</i> rs1815739         | Muscle size                              | XX genotype had lower mid-thigh area than RX/RR                                             | (Zempo et al., 2010)                            |
|                                | Knee extension torque                    | XX genotype had lower knee torque than RR/RX                                                | (Walsh et al., 2008)                            |
|                                | Sarcopenia                               | XX genotype at higher risk of sarcopenia                                                    | (Cho et al., 2017)                              |
|                                | Elite sprint athlete status              | RR genotype overrepresented in elite sprinter group versus controls                         | (Chen et al., 2020)                             |
| <i>ACE</i> rs4341 (I/D)        | Lean mass                                | D allele favourable for higher lean mass                                                    | (Charbonneau et al., 2008)                      |
|                                | Muscle strength and performance          | II genotype associated with higher handgrip strength and jump performance among adolescents | (Moran et al., 2006)                            |
| <i>CNTF</i> rs1800169          | Knee extension and elbow flexion         | GA heterozygotes had stronger than GG homozygotes                                           | (Roth et al., 2001)                             |
|                                | Knee flexion                             | A-allele carriers weaker than GG homozygotes in middle aged women                           | (De Mars et al., 2007)                          |
|                                | Knee extension                           | G allele favourable for knee strength among elderly                                         | (He et al., 2020)                               |
|                                | Handgrip strength                        | AA homozygotes had 3.8 kg weaker handgrip strength than G-allele carriers                   | (Arking et al., 2006)                           |
| <i>CNTFR</i> rs2070802         | Knee extension and flexion               | T-allele carriers could produce greater torque                                              | (De Mars et al., 2007)                          |
| <i>ESR1</i> rs4870044          | Sarcopenia                               | T-allele carriers had higher risk of sarcopenia                                             | (Khanal et al., 2020)                           |
| <i>FTO</i> rs9939609           | Body mass and obesity related phenotypes | A allele favoured higher BMI, obesity indices and muscle mass                               | (Jacobsson et al., 2012, Al-Serri et al., 2018) |
|                                | Sarcopenia                               | AA homozygotes at higher risk of sarcopenia than T-allele carriers                          | (Khanal et al., 2020)                           |
| <i>HIF1A</i> rs11549465        | Oxygen consumption capacity              | TT associated with higher $\dot{V}O_{2max}$ among elderly                                   | (Prior et al., 2003)                            |
|                                | Strength/power athlete status            | Overrepresentation of TT genotype in athletes compared to controls                          | (Ahmetov et al., 2008, Drozdovska et al., 2013) |
| <i>ID3</i> rs11574             | Obesity-related indices                  | A allele associated with increment in BMI and fat mass over the time                        | (Svendstrup et al., 2018)                       |
| <i>IGF1</i> rs35767            | Body composition                         | CC homozygotes had greater total fat but lower lean and muscle mass                         | (Kostek et al., 2010)                           |
| <i>IL6</i> rs1800795           | Elite athlete status                     | Overrepresentation of G- allele among athletes                                              | (Ruiz et al., 2010, Cenikli et al., 2016)       |

|                                                               |                                    |                                                                                                            |                                                                                              |
|---------------------------------------------------------------|------------------------------------|------------------------------------------------------------------------------------------------------------|----------------------------------------------------------------------------------------------|
| <i>MTHFR</i><br>rs1801131<br>rs1537516<br>rs17421511          | Strength/sprint athlete status     | Overrepresentation of rs1801131 C allele among athletes                                                    | (Zarebska et al., 2014)                                                                      |
|                                                               | Maximal rate of oxygen consumption | rs1801131 C-allele carriers had greater improvement in $VO_{2max}$ during training                         | (Cięszczyk et al., 2016)                                                                     |
| <i>PTK2</i><br>rs7843014,<br>rs7460                           | Exceptional longevity              | rs7843014 CC and rs7460 TT associated with longevity                                                       | (Garatachea et al., 2014)                                                                    |
|                                                               | Specific force                     | AA homozygotes had greater vastus lateralis specific force in healthy population                           | (Erskine et al., 2012, Stebbings et al., 2017)                                               |
| <i>TRHR</i> rs7832552                                         | Lean body mass                     | T allele favoured greater lean body mass                                                                   | (Liu et al., 2009, Lunardi et al., 2013)                                                     |
|                                                               | Sarcopenia                         | C-allele carriers at higher risk of sarcopenia than TT homozygotes                                         | (Khanal et al., 2020)                                                                        |
| <i>TTN</i> rs10497520                                         | Endurance running performance      | T-allele carriers had better marathon performance                                                          | (Stebbins et al., 2018)                                                                      |
|                                                               | Knee strength                      | C-allele is associated with higher knee strength among elderly                                             | (He et al., 2018)                                                                            |
| <i>VDR</i> rs2228570                                          | Muscle size                        | F (C) allele associated with lower fat-free-mass                                                           | (Roth et al., 2004)                                                                          |
|                                                               | Knee strength                      | F/FF allele/genotype had lower knee strength compared to f-allele carriers                                 | (Windelinckx et al., 2007, Hopkinson et al., 2008)                                           |
|                                                               | Muscle mass/Sarcopenia             | f-allele had higher risk of sarcopenia group and lower fat-free mass                                       | (Roth et al., 2004, Walsh et al., 2016)                                                      |
| <i>MSTN</i> rs1805086                                         | Muscle strength/muscle size        | R153 allele associated with lower muscle strength                                                          | (Seibert et al., 2001, Corsi et al., 2002)                                                   |
|                                                               |                                    | R153 allele associated with lower muscle mass among elderly women                                          | (González-Freire et al., 2010)                                                               |
|                                                               |                                    | R allele associated with higher elbow flexion torque peak power                                            | (Kostek et al., 2009, Santiago et al., 2011)                                                 |
|                                                               |                                    | KR heterozygotes had greater increment in bicep and quadriceps thickness than KK homozygotes post training | (Li et al., 2014)                                                                            |
| <i>COL1A1</i> rs1800012                                       | Muscle strength                    | A-allele associated with lower handgrip and biceps strength in elderly                                     | (Van Pottelbergh et al., 2001)                                                               |
| <i>ACVR1B</i><br>rs2854464<br><br><i>ACVR1B</i><br>rs10783485 | Muscle strength                    | A allele associated with higher knee strength                                                              | (Windelinckx et al., 2011)                                                                   |
|                                                               | Sprint/power athlete status        | A allele overrepresented in sprint and power athletes                                                      | (Voisin et al., 2016)                                                                        |
|                                                               | Muscle mass                        | A allele associated with higher SMM                                                                        | (He et al., 2018)                                                                            |
|                                                               | Muscle strength                    | rs10783485 C allele linked to higher knee flexion                                                          | (Windelinckx et al., 2011)                                                                   |
| <i>NOS3</i> rs1799983                                         | Power athlete status               | T allele common among power athletes                                                                       | (Gómez-Gallego et al., 2009, Sessa et al., 2011, Zmijewski et al., 2018, Eider et al., 2014) |
|                                                               | Stroke volume                      | Postmenopausal women with T-allele had higher stroke volume during dynamic exercise                        | (Hand et al., 2006)                                                                          |
|                                                               | Sarcopenia                         | T allele carriers had higher skeletal muscle mass above sarcopenic threshold                               | (Khanal et al., 2020)                                                                        |

## References

1. AHMETOV, II, HAKIMULLINA, A. M., LYUBAEVA, E. V., VINOGRADOVA, O. L. & ROGOZKIN, V. A. 2008. Effect of HIF1A gene polymorphism on human muscle performance. *Bulletin of experimental biology and medicine*, 146, 351-353.
2. AL-SERRI, A., AL-BUSTAN, S. A., KAMKAR, M., THOMAS, D., ALSMADI, O., AL-TEMAIMI, R., MOJIMINIYI, O. A. & ABDELLA, N. A. 2018. Association of FTO rs9939609 with Obesity in the Kuwaiti Population: A Public Health Concern? *Medical Principles and Practice*, 27, 145-151.
3. ARKING, D. E., FALLIN, D. M., FRIED, L. P., LI, T., BEAMER, B. A., XUE, Q. L., CHAKRAVARTI, A. & WALSTON, J. 2006. Variation in the ciliary neurotrophic factor gene and muscle strength in older Caucasian women. *Journal of the American Geriatrics Society*, 54, 823-826.
4. CENIKLI, A., NURSAL, A., TURAL, E., POLAT, Y., TASMEKTEPLIGIL, M. & YIGIT, S. 2016. The Correlation Between Rs1800795 Variant of IL-6 and sports performance among turkish elite athletes. *International Journal of Humanities Social Sciences and Education*, 3, 1-5.
5. CHARBONNEAU, D. E., HANSON, E. D., LUDLOW, A. T., DELMONICO, M. J., HURLEY, B. F. & ROTH, S. M. 2008. ACE genotype and the muscle hypertrophic and strength responses to strength training. *Medicine and science in sports and exercise*, 40, 677.
6. CHEN, W., ZHANG, B., LI, Y. & LIANG, T. 2020. Association Between rs1815739 Polymorphism of ACTN3 Gene and Athletic Ability in Chinese Sprinters. *Journal of Science in Sport and Exercise*, 2, 113-119.
7. CHO, J., LEE, I. & KANG, H. 2017. ACTN3 gene and susceptibility to sarcopenia and osteoporotic status in older Korean adults. *BioMed research international*, 2017.
8. CIĘSZCZYK, P., ZARĘBSKA, A., JASTRZĘBSKI, Z., SAWCZYN, M., KOZAKIEWICZ-DROBNIK, I., LEONSKA-DUNIEC, A., KACZMARCZYK, M., MACIEJEWSKA-SKRENDO, A., ŻMIJEWSKI, P. & TRYBEK, G. 2016. Does the MTHFR A1298C Polymorphism Modulate the Cardiorespiratory Response to Training? *Journal of human kinetics*, 54, 43-53.
9. CORSI, A. M., FERRUCCI, L., GOZZINI, A., TANINI, A. & BRANDI, M. L. 2002. Myostatin polymorphisms and age-related sarcopenia in the Italian population. *Journal of the American Geriatrics Society*, 50, 1463-1463.
10. DE MARS, G., WINDELINCKX, A., BEUNEN, G., DELECLUSE, C., LEFEVRE, J. & THOMIS, M. A. I. 2007. Polymorphisms in the CNTF and CNTF receptor genes are associated with muscle strength in men and women. *Journal of Applied Physiology*, 102, 1824-1831.
11. DROZDOVSKA, S., DOSENKO, V., AHMETOV, I. & ILYIN, V. 2013. The association of gene polymorphisms with athlete status in Ukrainians. *Biology of sport*, 30, 163.
12. EIDER, J., FICEK, K., KACZMARCZYK, M., MACIEJEWSKA-KARŁOWSKA, A., SAWCZUK, M. & CIĘSZCZYK, P. 2014. Endothelial nitric oxide synthase g894t (rs1799983) gene polymorphism in polish athletes. *Open Life Sciences*, 9, 260-267.
13. ERSKINE, R. M., WILLIAMS, A. G., JONES, D. A., STEWART, C. E. & DEGENS, H. 2012. Do PTK2 gene polymorphisms contribute to the interindividual variability in muscle strength and the response to resistance training? A preliminary report. *Journal of applied physiology*, 112, 1329-1334.
14. GARATACHEA, N., FUKU, N., HE, Z.-H., TIAN, Y., ARAI, Y., ABE, Y., MURAKAMI, H., MIYACHI, M., YVERT, T. & VENTURINI, L. 2014. PTK2 rs7460 and rs7843014 polymorphisms and exceptional longevity: a functional replication study. *Rejuvenation research*, 17, 430-438.
15. GÓMEZ-GALLEGO, F., RUIZ, J. R., BUXENS, A., ARTIEDA, M., ARTETA, D., SANTIAGO, C., RODRÍGUEZ-ROMO, G., LAO, J. I. & LUCIA, A. 2009. The- 786 T/C polymorphism of the NOS3 gene is associated with elite performance in power sports. *European journal of applied physiology*, 107, 565-569.
16. GONZÁLEZ-FREIRE, M., RODRÍGUEZ-ROMO, G., SANTIAGO, C., BUSTAMANTE-ARA, N., YVERT, T., GÓMEZ-GALLEGO, F., REXACH, J. A. S., RUIZ, J. R. & LUCIA, A. 2010. The K153R variant in the myostatin gene and sarcopenia at the end of the human lifespan. *Age*, 32, 405-409.
17. HAND, B. D., MCCOLE, S. D., BROWN, M. D., PARK, J. J., FERRELL, R. E., HUBERTY, A., DOUGLASS, L. W. & HAGBERG, J. M. 2006. NOS3 gene polymorphisms and exercise hemodynamics in postmenopausal women. *International journal of sports medicine*, 27, 951-958.
18. HE, L., KHANAL, P., MORSE, C. I., WILLIAMS, A. & THOMIS, M. 2020. Associations of combined genetic and epigenetic scores with muscle size and muscle strength: a pilot study in older women. *Journal of Cachexia, Sarcopenia and Muscle*.
19. HE, L., VAN ROIE, E., BOGAERTS, A., MORSE, C. I., DELECLUSE, C., VERSCHUEREN, S. & THOMIS, M. 2018. Genetic predisposition score predicts the increases of knee strength and muscle mass after one-year exercise in healthy elderly. *Experimental gerontology*, 111, 17-26.
20. HOPKINSON, N. S., LI, K. W., KEHOE, A., HUMPHRIES, S. E., ROUGHTON, M., MOXHAM, J., MONTGOMERY, H. & POLKEY, M. I. 2008. Vitamin D receptor genotypes influence quadriceps strength in chronic obstructive pulmonary disease. *The American journal of clinical nutrition*, 87, 385-390.
21. JACOBSSON, J. A., SCHIÖTH, H. B. & FREDRIKSSON, R. 2012. The impact of intronic single nucleotide polymorphisms and ethnic diversity for studies on the obesity gene FTO. *Obesity Reviews*, 13, 1096-1109.
22. KHANAL, P., HE, L., STEBBINGS, G., ONAMBELE-PEARSON, G. L., DEGENS, H., WILLIAMS, A., THOMIS, M. & MORSE, C. I. 2020. Prevalence and association of single nucleotide polymorphisms with sarcopenia in older women depends on definition. *Scientific reports*, 10, 1-9.
23. KOSTEK, M. A., ANGELOPOULOS, T. J., CLARKSON, P. M., GORDON, P. M., MOYNA, N. M., VISICH, P. S., ZOELLER, R. F., PRICE, T. B., SEIP, R. L. & THOMPSON, P. D. 2009. Myostatin and follistatin polymorphisms interact with muscle phenotypes and ethnicity. *Medicine and science in sports and exercise*, 41, 1063.
24. KOSTEK, M. C., DEVANEY, J. M., GORDISH-DRESSMAN, H., HARRIS, T. B., THOMPSON, P. D., CLARKSON, P. M., ANGELOPOULOS, T. J., GORDON, P. M., MOYNA, N. M. & PESCATELLO, L. S. 2010. A polymorphism near IGF1 is

associated with body composition and muscle function in women from the Health, Aging, and Body Composition Study. *European journal of applied physiology*, 110, 315-324.

25. LI, X., WANG, S.-J., TAN, S. C., CHEW, P. L., LIU, L., WANG, L., WEN, L. & MA, L. 2014. The A55T and K153R polymorphisms of MSTN gene are associated with the strength training-induced muscle hypertrophy among Han Chinese men. *Journal of sports sciences*, 32, 883-891.
26. LIU, X.-G., TAN, L.-J., LEI, S.-F., LIU, Y.-J., SHEN, H., WANG, L., YAN, H., GUO, Y.-F., XIONG, D.-H. & CHEN, X.-D. 2009. Genome-wide association and replication studies identified TRHR as an important gene for lean body mass. *The American Journal of Human Genetics*, 84, 418-423.
27. LUNARDI, C. C., LIMA, R. M., PEREIRA, R. W., LEITE, T. K. M., SIQUEIRA, A. B. M. & OLIVEIRA, R. J. 2013. Association between polymorphisms in the TRHR gene, fat-free mass, and muscle strength in older women. *Age*, 35, 2477-2483.
28. MORAN, C. N., VASSILOPOULOS, C., TSIOKANOS, A., JAMURTAS, A. Z., BAILEY, M. E. S., MONTGOMERY, H. E., WILSON, R. H. & PITSILADIS, Y. P. 2006. The associations of ACE polymorphisms with physical, physiological and skill parameters in adolescents. *European journal of human genetics*, 14, 332.
29. PRIOR, S. J., HAGBERG, J. M., PHARES, D. A., BROWN, M. D., FAIRFULL, L., FERRELL, R. E. & ROTH, S. M. 2003. Sequence variation in hypoxia-inducible factor 1 $\alpha$  (HIF1A): association with maximal oxygen consumption. *Physiological genomics*, 15, 20-26.
30. ROTH, S. M., SCHRAGER, M. A., FERRELL, R. E., RIECHMAN, S. E., METTER, E. J., LYNCH, N. A., LINDLE, R. S. & HURLEY, B. F. 2001. CNTF genotype is associated with muscular strength and quality in humans across the adult age span. *Journal of applied physiology*, 90, 1205-1210.
31. ROTH, S. M., ZMUDA, J. M., CAULEY, J. A., SHEA, P. R. & FERRELL, R. E. 2004. Vitamin D receptor genotype is associated with fat-free mass and sarcopenia in elderly men. *The Journals of Gerontology Series A: Biological Sciences and Medical Sciences*, 59, B10-B15.
32. RUIZ, J. R., BUXENS, A., ARTIEDA, M., ARTETA, D., SANTIAGO, C., RODRÍGUEZ-ROMO, G., LAO, J. I., GÓMEZ-GALLEGO, F. & LUCIA, A. 2010. The- 174 G/C polymorphism of the IL6 gene is associated with elite power performance. *Journal of science and medicine in sport*, 13, 549-553.
33. SANTIAGO, C., RUIZ, J. R., RODRÍGUEZ-ROMO, G., FIUZA-LUCES, C., YVERT, T., GONZALEZ-FREIRE, M., GÓMEZ-GALLEGO, F., MORÁN, M. & LUCIA, A. 2011. The K153R polymorphism in the myostatin gene and muscle power phenotypes in young, non-athletic men. *PLoS one*, 6, e16323.
34. SEIBERT, M. J., XUE, Q. L., FRIED, L. P. & WALSTON, J. D. 2001. Polymorphic variation in the human myostatin (GDF-8) gene and association with strength measures in the women's health and aging study II cohort. *Journal of the American Geriatrics Society*, 49, 1093-1096.
35. SESSA, F., CHETTA, M., PETITO, A., FRANZETTI, M., BAFUNNO, V., PISANELLI, D., SARNO, M., IUSO, S. & MARGAGLIONE, M. 2011. Gene polymorphisms and sport attitude in Italian athletes. *Genetic testing and molecular biomarkers*, 15, 285-290.
36. STEBBINGS, G. K., WILLIAMS, A. G., HERBERT, A. J., LOCKEY, S. J., HEFFERNAN, S. M., ERSKINE, R. M., MORSE, C. I. & DAY, S. H. 2018. TTN genotype is associated with fascicle length and marathon running performance. *Scandinavian journal of medicine & science in sports*, 28, 400-406.
37. STEBBINGS, G. K., WILLIAMS, A. G., MORSE, C. I. & DAY, S. H. 2017. Polymorphisms in PTK2 are associated with skeletal muscle specific force: an independent replication study. *European journal of applied physiology*, 117, 713-720.
38. SVENDSTRUP, M., APPEL, E. V. R., SANDHOLT, C. H., AHLUWALIA, T. S., ÅNGQUIST, L. H., THUESEN, B. H., JØRGENSEN, M. E., PEDERSEN, O., GRARUP, N. & HANSEN, T. 2018. Prospective studies exploring the possible impact of an ID3 polymorphism on changes in obesity measures. *Obesity*, 26, 747-754.
39. VAN POTTELBERGH, I., GOEMAERE, S., NUYTINCK, L., DE PAEPE, A. & KAUFMAN, J. M. 2001. Association of the type I collagen alpha1 Sp1 polymorphism, bone density and upper limb muscle strength in community-dwelling elderly men. *Osteoporosis International*, 12, 895-901.
40. VOISIN, S., GUILHERME, J. P. F. L., YAN, X., PUSHKAREV, V. P., CIESZCZYK, P., MASSIDDA, M., CALÒ, C. M., DYATLOV, D. A., KOLUPAEV, V. A. & PUSHKAREVA, Y. E. 2016. ACVR1B rs2854464 is associated with sprint/power athletic status in a large cohort of Europeans but not Brazilians. *PLoS one*, 11, e0156316.
41. WALSH, S., LIU, D., METTER, E. J., FERRUCCI, L. & ROTH, S. M. 2008. ACTN3 genotype is associated with muscle phenotypes in women across the adult age span. *Journal of Applied Physiology*, 105, 1486-1491.
42. WALSH, S., LUDLOW, A. T., METTER, E. J., FERRUCCI, L. & ROTH, S. M. 2016. Replication study of the vitamin D receptor (VDR) genotype association with skeletal muscle traits and sarcopenia. *Aging clinical and experimental research*, 28, 435-442.
43. WINDELINCKX, A., DE MARS, G., BEUNEN, G., AERSSENS, J., DELECLUSE, C., LEFEVRE, J. & THOMIS, M. A. I. 2007. Polymorphisms in the vitamin D receptor gene are associated with muscle strength in men and women. *Osteoporosis International*, 18, 1235-1242.
44. WINDELINCKX, A., DE MARS, G., HUYGENS, W., PEETERS, M. W., VINCENT, B., WIJMENGA, C., LAMBRECHTS, D., DELECLUSE, C., ROTH, S. M. & METTER, E. J. 2011. Comprehensive fine mapping of chr12q12-14 and follow-up replication identify activin receptor 1B (ACVR1B) as a muscle strength gene. *European Journal of Human Genetics*, 19, 208.
45. ZAREBSKA, A., AHMETOV, I. I., SAWCZYN, S., WEINER, A. S., KACZMARCZYK, M., FICEK, K., MACIEJEWSKA-KARLOWSKA, A., SAWCZUK, M., LEONSKA-DUNIEC, A. & KLOCEK, T. 2014. Association of the MTHFR 1298A> C (rs1801131) polymorphism with speed and strength sports in Russian and Polish athletes. *Journal of sports sciences*, 32, 375-382.
46. ZEMPO, H., TANABE, K., MURAKAMI, H., IEMITSU, M., MAEDA, S. & KUNO, S. 2010. ACTN3 polymorphism affects thigh muscle area. *International journal of sports medicine*, 31, 138-142.

47. ZMIJEWSKI, P., CIESZCZYK, P. & AHMETOV, II 2018. The NOS3 G894T (rs1799983) and-786T/C (rs2070744) polymorphisms are associated with elite swimmer status. *Biol Sport*, 35, 313-319.
